# Supplementary material for: Satureja hortensis L. and Calendula officinalis L., Two Romanian Plants, with In Vivo Antiparasitic Potential against Digestive Parasites of Swine
Source: MDPI journal article supplement (doi:10.3390/microorganisms11122980), 2023-12-13
Supplement: s1 [file s1]

## Supplementary Data

**Table S1.** Ontologies/ medicinal plants, chemical compounds, pathogens, and diseases, used in experiment.

| Traits                      | ATOL*, AHOL**, OPL***, IPNI****, and ChEBI***** |              |
|-----------------------------|-------------------------------------------------|--------------|
|                             | References                                      |              |
| Medicinal plants used       | <i>Calendula officinalis</i> L                  | 187894-1     |
|                             | <i>Satureja hortensis</i> L.                    | 457680-1     |
| Chemical compounds detected | Polyphenols (µg/mL)                             | 26195        |
|                             | Tocopherols (ng/mL)                             | 135821       |
|                             | Methoxylated flavones (ng/mL)                   | 25241        |
|                             | Sterols (µg/mL)                                 | 15889        |
| Parasite load traits        | Parasite Oocysts (OPG)                          | Oocyst Stage |
|                             | Parasite Cysts                                  | Cyst Stage   |
|                             | Parasite Eggs (EPG)                             | Egg Stage    |
| Parasite used               | <i>Eimeria</i> spp.                             | AHOL_0004070 |
|                             | <i>Balantioides coli</i>                        | AHOL_0004016 |
|                             | <i>Ascaris suum</i>                             | AHOL_0004179 |
|                             | <i>Trichuris suis</i>                           | AHOL_0004186 |
|                             | <i>Oesophagostomum</i> spp.                     | AHOL_0004181 |
|                             | <i>Cryptosporidium</i> spp.                     | AHOL_0004175 |
| Disease description         | Ascariidiosis                                   | AHOL_0005382 |
|                             | Coccidiosis                                     | AHOL_0005374 |
|                             | Cryptosporidiosis                               | AHOL_0005377 |

\*Traits in reference to the ontology ATOL: <https://www.atol-o.com/en/atol-2/>; \*\*Traits in reference to the ontology AHOL: <https://www.atol-ontology.com/ahol/>; \*\*\* Ontology for Parasite Life cycle: [http://wiki.aiisc.ai/index.php/Ontology\\_for\\_Parasite\\_Life\\_Cycle](http://wiki.aiisc.ai/index.php/Ontology_for_Parasite_Life_Cycle); \*\*\*\* International Plant Names Index-IPNI : <https://www.ipni.org/p/3>; \*\*\*\*\* Chemical Entities of Biological Interest-ChEBI: <https://www.ebi.ac.uk/chebi/>.

**Table S2.** The prevalence (P) at 0, 14 and 28 days in weaners.

| <b>F1</b>                   |              |               |               |                |               |                |
|-----------------------------|--------------|---------------|---------------|----------------|---------------|----------------|
|                             | <b>C (0)</b> | <b>CO (0)</b> | <b>C (14)</b> | <b>CO (14)</b> | <b>C (28)</b> | <b>CO (28)</b> |
| <b>Parasite</b>             | P %          | P %           | P %           | P %            | P %           | P %            |
| <i>Eimeria</i> spp.         | 20           | 30            | 40            | 10             | 50            | 20             |
| <i>B. coli</i>              | 80           | 80            | 100           | 30             | 100           | 50             |
| <i>Cryptosporidium</i> spp. | 20           | 20            | 20            | 10             | 30            | 20             |
|                             | <b>C (0)</b> | <b>SH (0)</b> | <b>C (14)</b> | <b>SH (14)</b> | <b>C (28)</b> | <b>SH (28)</b> |
| <b>Parasite</b>             | P %          | P %           | P %           | P %            | P %           | P %            |
| <i>Eimeria</i> spp.         | 60           | 70            | 50            | 20             | 40            | 20             |
| <i>B. coli</i>              | 90           | 100           | 80            | 10             | 90            | 30             |
| <i>Cryptosporidium</i> spp. | 20           | 30            | 20            | 30             | 10            | 10             |
| <b>F2</b>                   |              |               |               |                |               |                |
|                             | <b>C (0)</b> | <b>CO (0)</b> | <b>C (14)</b> | <b>CO (14)</b> | <b>C (28)</b> | <b>CO (28)</b> |
| <b>Parasite</b>             | P %          | P %           | P %           | P %            | P %           | P %            |
| <i>Eimeria</i> spp.         | 100          | 90            | 80            | 40             | 80            | 40             |
| <i>B. coli</i>              | 80           | 90            | 90            | 30             | 100           | 90             |
| <i>Oesophagostomum</i> spp. | 40           | 50            | 50            | 20             | 40            | 30             |
| <i>Cryptosporidium</i> spp. | 20           | 30            | 20            | 20             | 10            | 10             |
|                             | <b>C (0)</b> | <b>SH (0)</b> | <b>C (14)</b> | <b>SH (14)</b> | <b>C (28)</b> | <b>SH (28)</b> |
| <b>Parasite</b>             | P %          | P %           | P %           | P %            | P %           | P %            |
| <i>Eimeria</i> spp.         | 80           | 90            | 70            | 20             | 80            | 20             |
| <i>B. coli</i>              | 90           | 90            | 70            | 50             | 100           | 30             |
| <i>Cryptosporidium</i> spp. | 20           | 20            | 20            | 10             | 10            | 10             |

F=farm, C=control, SH=*S. hortensis*, CO=*C. officinalis*

**Table S3.** The prevalence (P), at 0, 14 and 28 days in fatteners.

| <b>F1</b>           |              |               |               |                |               |                |
|---------------------|--------------|---------------|---------------|----------------|---------------|----------------|
|                     | <b>C (0)</b> | <b>CO (0)</b> | <b>C (14)</b> | <b>CO (14)</b> | <b>C (28)</b> | <b>CO (28)</b> |
| <b>Parasite</b>     | P %          | P %           | P %           | P %            | P %           | P %            |
| <i>Eimeria</i> spp. | 20           | 30            | 40            | 20             | 50            | 30             |
| <i>B. coli</i>      | 90           | 100           | 100           | 30             | 100           | 40             |
| <i>A. suum</i>      | 40           | 40            | 30            | 30             | 40            | 20             |
|                     | <b>C (0)</b> | <b>SH (0)</b> | <b>C (14)</b> | <b>SH (14)</b> | <b>C (28)</b> | <b>SH (28)</b> |
| <b>Parasite</b>     | P %          | P %           | P %           | P %            | P %           | P %            |
| <i>Eimeria</i> spp. | 30           | 40            | 40            | 10             | 50            | 20             |
| <i>B. coli</i>      | 90           | 100           | 90            | 20             | 80            | 30             |
| <i>A. suum</i>      | 80           | 90            | 100           | 40             | 100           | 20             |
| <i>T. suis</i>      | 40           | 50            | 60            | 30             | 50            | 20             |
| <b>F2</b>           |              |               |               |                |               |                |
|                     | <b>C (0)</b> | <b>CO (0)</b> | <b>C (14)</b> | <b>CO (14)</b> | <b>C (28)</b> | <b>CO (28)</b> |
| <b>Parasite</b>     | P %          | P %           | P %           | P %            | P %           | P %            |
| <i>Eimeria</i> spp. | 100          | 100           | 80            | 20             | 70            | 40             |
| <i>B. coli</i>      | 70           | 80            | 80            | 40             | 90            | 70             |
| <i>A. suum</i>      | 80           | 90            | 100           | 100            | 100           | 100            |
| <i>T. suis</i>      | 90           | 90            | 80            | 80             | 60            | 50             |
|                     | <b>C (0)</b> | <b>SH (0)</b> | <b>C (14)</b> | <b>SH (14)</b> | <b>C (28)</b> | <b>SH (28)</b> |
| <b>Parasite</b>     | P %          | P %           | P %           | P %            | P %           | P %            |
| <i>Eimeria</i> spp. | 80           | 80            | 70            | 10             | 70            | 30             |
| <i>B. coli</i>      | 80           | 90            | 70            | 50             | 90            | 30             |
| <i>A. suum</i>      | 90           | 90            | 80            | 40             | 100           | 20             |
| <i>T. suis</i>      | 70           | 60            | 70            | 10             | 60            | 20             |

F=farm, C=control, SH=*S. hortensis*, CO=*C. officinalis*.

**Table S4.** The prevalence (P), at 0, 14 and 28 days in sows.

| <b>F1</b>                   |              |               |               |                |               |                |
|-----------------------------|--------------|---------------|---------------|----------------|---------------|----------------|
|                             | <b>C (0)</b> | <b>CO (0)</b> | <b>C (14)</b> | <b>CO (14)</b> | <b>C (28)</b> | <b>CO (28)</b> |
| <b>Parasite</b>             | P %          | P %           | P %           | P %            | P %           | P %            |
| <i>B. coli</i>              | 90           | 100           | 90            | 40             | 100           | 50             |
|                             | <b>C (0)</b> | <b>SH (0)</b> | <b>C (14)</b> | <b>SH (14)</b> | <b>C (28)</b> | <b>SH (28)</b> |
| <b>Parasite</b>             | P %          | P %           | P %           | P %            | P %           | P %            |
| <i>Eimeria</i> spp.         | 30           | 40            | 30            | 10             | 40            | 10             |
| <i>B. coli</i>              | 90           | 100           | 70            | 20             | 80            | 20             |
| <i>A. suum</i>              | 30           | 40            | 40            | 10             | 40            | 10             |
| <i>Oesophagostomum</i> spp. | 30           | 40            | 20            | 10             | 10            | -              |
| <b>F2</b>                   |              |               |               |                |               |                |
|                             | <b>C (0)</b> | <b>CO (0)</b> | <b>C (14)</b> | <b>CO (14)</b> | <b>C (28)</b> | <b>CO (28)</b> |
| <b>Parasite</b>             | P %          | P %           | P %           | P %            | P %           | P %            |
| <i>Eimeria</i> spp.         | 50           | 60            | 60            | 50             | 60            | 40             |
| <i>B. coli</i>              | 60           | 70            | 90            | 30             | 80            | 30             |
| <i>A. suum</i>              | 20           | 30            | 30            | 30             | 40            | 10             |
| <i>Oesophagostomum</i> spp. | 70           | 70            | 70            | 70             | 70            | 30             |
| <i>Cryptosporidium</i> spp. | 10           | 10            | -             | -              | 10            | -              |
|                             | <b>C (0)</b> | <b>SH (0)</b> | <b>C (14)</b> | <b>SH (14)</b> | <b>C (28)</b> | <b>SH (28)</b> |
| <b>Parasite</b>             | P %          | P %           | P %           | P %            | P %           | P %            |
| <i>Eimeria</i> spp.         | 50           | 60            | 40            | 10             | 60            | 20             |
| <i>B. coli</i>              | 80           | 80            | 70            | 20             | 90            | 30             |
| <i>A. suum</i>              | 30           | 30            | 40            | 10             | 40            | 10             |
| <i>Oesophagostomum</i> spp. | 20           | 30            | 30            | 20             | 30            | 10             |
| <i>Cryptosporidium</i> spp. | 10           | 10            | 10            | -              | 10            | 10             |

F=farm, C=control, SH=*S. hortensis*, CO=*C. officinalis*.
